# Supplementary material
Source: PubMed Central journal article supplement (PMC3932850)
Supplement: 1320599111_pnas.201320599SI.pdf [file 1320599111_pnas.201320599SI.pdf]

# Supporting Information

Watanabe et al. 10.1073/pnas.1320599111

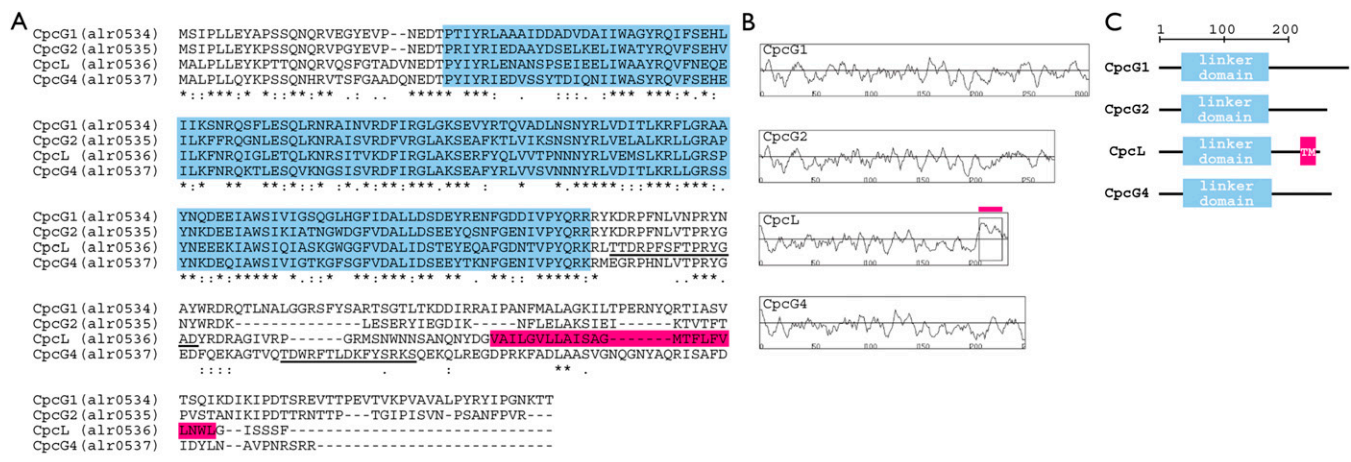

**Fig. S1.** Molecular characterization of CpcL and CpcG variants. (A) Sequence alignment, (B) hydropathy plots, and (C) domain architecture are shown for the four proteins. The hydrophobic segment specific to CpcL is highlighted in magenta. Linker domains are highlighted in blue. The underlined sequences indicate synthetic peptides that were used to generate antibodies.

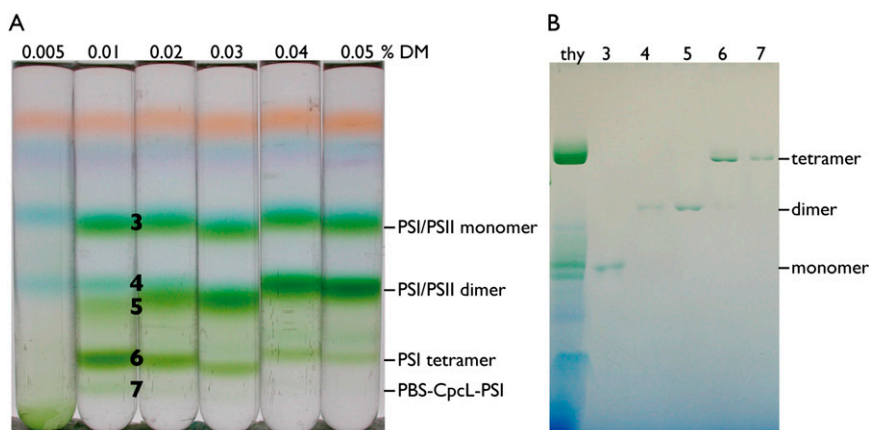

**Fig. S2.** Fractionation of *n*-dodecyl- $\beta$ -D-maltoside (DM)-solubilized thylakoids by linear sucrose gradient centrifugation in the presence of a low-salt buffer. (A) Fractionation profile after centrifugation at  $130,000 \times g$  for 18 h at 4 °C. The sucrose gradient contained 0.005–0.05% DM. (B) Blue-native PAGE of the fractions. Fraction numbers correspond to those of 0.01% DM in A. Thylakoid (thy) was used as a marker.

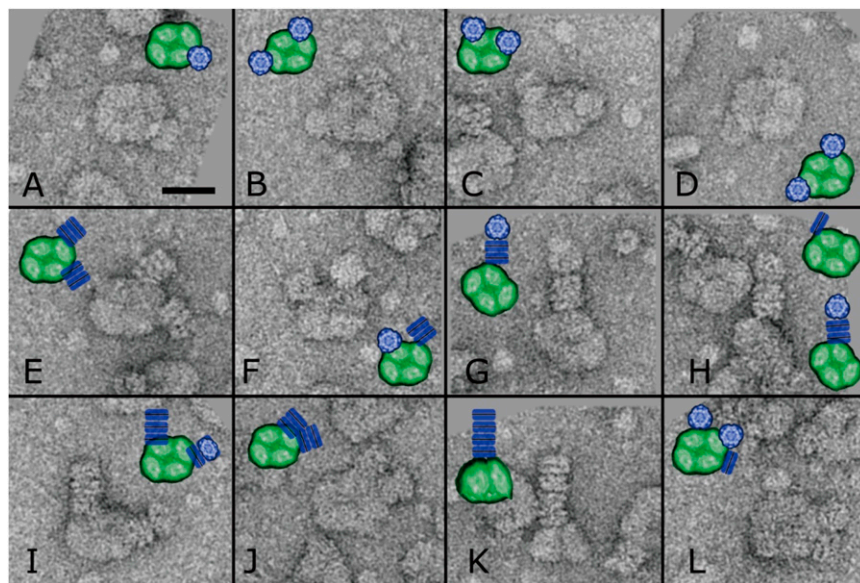

**Fig. 53.** Representative examples of EM projections of negatively stained phycobilisome (PBS)–CpL–photosystem I (PSI) supercomplex and fragments of these complexes. (A–D) Projection maps showing PSI tetramers in an almost nontilted situation with one to two vertically positioned phycocyanin (PC) rods attached at the periphery. Models at 70% scaling illustrate positions of the PC hexamers of the CpL–PBS rods (blue) on the tetramers (green). (E and F) Projection maps of tetramers with two rods, each composed of two PC hexamers, which have fallen over. (G and H) Projection maps of tetramers in the top-view position with disintegrated rods made of three PC/PEC hexamers. The first two hexamers are in a side-on position, the last (*Upper*) hexamer lays in a face-on position. (I and J) Projection maps of tetramers showing part of the PBS rods in a position intermediate to the face-on and side-on position. (K) Map of a tetramer in side-view position with a PBS rod consisting of four PC/PEC hexamers attached. (L) Rare case of a projection of a tetramer with three PBS rods attached. (Scale bar = 200 Å.)

|                            |                                                                                                      |     |
|----------------------------|------------------------------------------------------------------------------------------------------|-----|
|                            | ****: ***** *****;***;*****:;*..** *****;*****;***** *****;                                          |     |
| <i>Anabaena</i> 7120       | MALPLLEYKPTTQNRVQSFSGTADVNETPYYIRLENANSPSEIEELIWAAYRQVFNEQEILKFNRQIGLETQLKNRSITVKDFIRGLAKSERFYQLVVT  | 100 |
| <i>Anabaena variabilis</i> | MALPLLEYKPTTQNRVQSFSGTADVNETPYYIRLEDANSPSEIEELIWAAYRQVFNEQEILKFNRQIGLETQLKNRSITVKDFIRGLAKSERFYQLVVT  | 100 |
| <i>Fischerella</i> JSC11   | MALPIHTYKPTTQNRVCSFGTADLNEDSPYYIRLEDTNSSGEIAELIWAAYRQVFNEQEILQFNRIQALETQLKNRSITVRDFIRGLAKSGRFYQLVVA  | 100 |
|                            | .*****: *****;***;***;*****:;*..***** *****;*****;***** *****;.. : : *                               |     |
| <i>Anabaena</i> 7120       | PNNNYRLVEMSLKRLLRSPYNEEEKIAWSIQIASKGWGGFVDALIDSTEYEQAFGDNTVPYQKRRLTDRPFSFTRYGADYRDRAGIVRPGRMSN--W    | 198 |
| <i>Anabaena variabilis</i> | PNNNYRLVEMSLKRLLRSPYNEEEKIAWSIQIASKGWGGFVDALIDSTEYEQAFGDNAVVPYQKRRLTDRPFSFTRYGADYRDRAGIVRPGRMSN--W   | 198 |
| <i>Fischerella</i> JSC11   | ANNNYRLVEICLKRLRGRAPYNQEEEEIAWSIQIATRGWSGFVDALIDSEEYEQAFGDNTVPYQKRKRMSTDRPFSFTRYGEDYRDRAGIVQTSWIHTEW | 200 |
|                            | .. : : * :* :*:::* *::***: **;* .. : : * :* :*:::* *::***: **;* .. : : * :* :*:::* *::***: **;*      |     |
| <i>Anabaena</i> 7120       | N----NSANQNYDGMALIGVLLAISTGLTFLFLVFNWLGISSSF                                                         | 237 |
| <i>Anabaena variabilis</i> | N----NSANQNYDGMALIGVLLAISTGLTFLFLVFNWLGISSSF                                                         | 237 |
| <i>Fischerella</i> JSC11   | YGFAPSPYPKQVDWRVLSAVLIGLSGIIAPLLIINWVNSSAF                                                           | 244 |

**Fig. 54.** Sequence alignment of CpL species. The hydrophobic segment is highlighted in magenta. Linker domains are highlighted in blue. *Anabaena variabilis*, CP000117.1; *Fischerella* sp. JSC-11, AGIZ0000000. \*, identical residues; :, conserved residues; ., similar residues.



**Table S1. N-terminal amino acid sequencing showing the determined sequences**

| Subunit | Amino acid sequence                                                                                                                                                                                                                                                                                               |
|---------|-------------------------------------------------------------------------------------------------------------------------------------------------------------------------------------------------------------------------------------------------------------------------------------------------------------------|
| PsaC    | <b>MSHTVKIYDTCIGCTQC</b> VRACPTDVLEMVPWDGCKAAQVASSPRTEDCVGCKRCETACPTDFLSIRVYLGAETTRSMGLAY                                                                                                                                                                                                                         |
| PsaD    | <b>MAETLSGKTP</b> LFAGSTGGLLTKAVEEEKYAITWTSKPAQVFEPLTGGAAATMHEGENLLYIARKEYGIALGGQLRKFKITNYKIYRILPSGETTFIHPAD<br>GVFPEKVNAGREKVRFNARSIGENPNPSQVKFSGKATYDA                                                                                                                                                          |
| PsaE    | <b>MVQRGSKVRILR</b> PESYWFQDVGTVASVDQSGIKYPVIVRFDKVNYAGINTNNFAVDELIEVEAPKAKAKK                                                                                                                                                                                                                                    |
| PsaF    | <b>MRR</b> LFALILVICLSFSFAPPAKAL <b>GADLTPCAENPAFQALAK</b> NARNTTADPQSGQKRFERYSQLCGPEGYPHLIVDGRDRAGDFLIPSILFLYI<br>AGWIGVWVGRAYLQAIKKDSDTEQKEIQDLGLIPIATGFAWPAAAVKELLSGELTAKDSEITVSPR                                                                                                                             |
| PsaI    | <b>MATA</b> FLPSILAD <b>ASFLSSIFV</b> PIVIGWVVIATFSFLFYIEREDVA                                                                                                                                                                                                                                                    |
| PsaJ    | <b>MADKADQSSYL</b> IKFISTAPVAATIWLITAGILIEFNRFPLLHPLP                                                                                                                                                                                                                                                             |
| PsaK    | <b>MLTSTLLAAATTPLEW</b> SPTVGIIMVIANVIAITFGRQTIKYPSAEPALPSAKFFGGFGAPALLATTAFGHILGVGLVGLHNLGRI                                                                                                                                                                                                                     |
| PsaL*   | <b>MAQAVDASKNLPSPDRNREVVFPAGRDP</b> QWGNLETPVNASPLVKWFINNLPAYRPGLTPFRRGLEVGMAGHYFLFGPFALGPLRDAANANLAGLL<br>GAIGLVVLFLLALSLYANSNPPTALASVTPNPPDAFQSKGEGWNNFASAFILGIGGAVVAYFLTSNLALIQLVGG                                                                                                                            |
| PsaX    | <b>MAKAKISPVANT</b> GAKPPYTFRTGWALLLLAVNFLVAAAYYFHIIQ                                                                                                                                                                                                                                                             |
| PecC    | <b>MSSSVAERLAIRD</b> AIGNKVELRQNWSEDDLQKVFRAAYEQIFGRQGIYASQKFTSAEALLRNGKISVRQFVEILAKSEFYKECFYKNSQVRLIELNY<br>KHLGRAPYDQSEIADHVDIYAARGYDADIDAYISSEYENAFGNSIVPYRGRFQSIQPMKTGVGNRICELYRGRGNSDNAQMGRNTSRLR<br>TKVSLNLPNGILPPTSAGTNFVSAAPTLISSATKGDNRMFVIEAIAAGGLNTNVAVRRSRQVYTVSYERLSATYQEIHKRGGKIVKISQV              |
| CpcA    | <b>MVKTPITEAIA</b> AADTQGRFLGNTELQSARGRYERAAASLEAARGLTSAQRLIDGATQAVYQKFPYTTQTPGPFQAADSRGKSKCARDVGH<br>YLRITYSLVAGGTGPLDEYLIAGLAEINSTFDLSPSWYVEALKHKIKANHGLSGQAANEANTYIDYAINALS                                                                                                                                    |
| CpcB    | <b>MTLDVFTKVV</b> SQADSRGEFLSNEQLDALANVVKEGNKRLDVNRITSNASAIVTNAARALFEEQPQLIAPGGNAYTNRRMAACLDRMEIILRYV<br>TYAILAGDASVLDLDRCLNGLRETYQALGTPGSSVAVGVQKMKDAAVGIANDPNGITKGDCSQLISEVASYFDRAAAAAGV                                                                                                                        |
| CpcC    | <b>MAITTAASRLGTEP</b> FSADPKVELRPKASREEVESVIRAVYRHLVGN DYILASERLVS AESLLRDGNLTVREFVRSVAKSELYKCKFFY<br>NSFQTRLIELNKHLLGRAPYDESEVYHLDLYQNKGYDAEIDSYDYSWEYQSNFGDNVVPYRGRFETQVGQKTAGFNIRFRLRYGYANS<br>RAQVEGTSRLARELASNKASTIVGPSGTNDSWGFASADVAPKKNLGNVAVGEGDRVYRLEVTVGIRSPGYPSVRR<br>SSTVFIVPYERLSDKIQQVHKQGGKIVSVTSA |
| CpcD    | <b>MFGQTTLGAGSVSS</b> ASRVFRYEVVGLRQSSSETDKNKYNIRNSGVSFVITVPYSRMNEEQRITRLGGKIVKIEQLVSAEA                                                                                                                                                                                                                          |
| CpcG1   | <b>MSIPLLEYAPSSQ</b> NQRVEGYEVPNEDTPTIYRLAAAIDDADVDI IWAGYRQIFSEHLIKSNRQSFLESQLRNRAINVRDFIRGLG<br>KSEVYRTQVADLNSNYRLVDITLKRFLGRAAYNQDEEIAWSIVIGSQGLHGFIDALLDSEYRENFDDIVPYQRRRYKDRPFNLVNPYRNAY<br>WRDRQTLNALGGRSFSYARTSGTLTKDDIRRAIPANFMALAGKILTPERNYQRTIASVTSQIKDIKIPDTSREVTTEVTVKPVAVALPYRYIPGNKTT               |
| CpcG2   | <b>MSIPLLEYKPS</b> SQNRVPGYEVPNEDTPRIYRIEDAAYDSELKELI WATYRQVFSEHVILKFFRQGNLESQKKNRAISVRDFVRGLAK<br>SEAFKTLVIKSNYRLVELALKRLLGRAPYKDEEIAWSIKIATNGWDGFDVALLDSEYQSNFGENIVPYQRRRYKDRPFNLVTPRYGNYW<br>RDKLESERYIEGDIKNFLELAKSIEIKTVTFTPVSTANIKIPDTRNTTPTGIPISVNPSANFPVR                                                |
| CpcG4   | <b>MALPLLQYKPS</b> SQNHRTSFGAADQNEPTPIYRIEDVSSYTDIQNIWASYSRQVFSEHEILKFNRQKTLESQVKNGSISVRDFIRGLAKSEAF<br>YRLVSVNNNYRLVDITLKRLLGRSSYNKDEQIAWSIVIGTKGFGSFDALIDSEYTKNFGENIVPYQRKRMEGRPHNLVTPRY<br>GEDFQEKAGTVQTDWRFTLDFYSRKSQEKQLREGDPRKFADLAASVGNQGNYAQRISAFDIDYLNVAVNPNSRR                                          |
| CpcL    | <b>MALP</b> LEYYKPTTQNRVQSFGTADVNEPTPIYRLENANSPSEIEELIWAAYRQVFNEQEILKFNRQIGLETQLKNRSITVKDFIRGLAKSERFYQLVV<br>TPNNNYRLVEMSLKRLGRSPYNEEKIAWSIQIASKGWGGFVDALIDSTEYEQAFGDNTVPYQRKRLTDRPFSFTPRYGADYRDRAGIVRP<br>GRMSNWNNSANQNYDGVAILGVLLAISAGMTFLVFLNWLGISSSF                                                          |
| ApcC    | <b>MSR</b> LFKITALVPSLSTRTRQRELQNTYFTKLVPEYENWFREQRQKAGGKIIKVELATGKQGTNAGLQ                                                                                                                                                                                                                                       |

Determined sequences are in boldface.

\*Three distinct N-terminal sequences are underlined.
